# Supplementary material
Source: PubMed Central journal article supplement (PMC2940498)
Supplement: en.2010-0237_1.pdf [file en.2010-0237_1.pdf]

## **Legends of Supplemental Figures**

### **Figure 1.** Expression of cardiac-specific genes in H9C2-MR+ cells

RT-PCR analysis was used to evaluate the expression of the Cacna1 Ca channel (primers: sense: CCTGAAGCCAAGGGTCGGAT; antisense: GTTGCCAAACAGGCCTCCAG) and the alpha myosin heavy chain (primers: sense: ACAGCTGGGAGAAGGGGGTA; antisense: GTCGTCATTGGCACGGACTG). H9C2-MR+ cells express these two cardiac-specific genes indicating that they display properties of cardiomyocytes.

### **Figure 2.** Expression levels of endogenous and transgenic MR or GR in MRcardio, GRcardio mice and their respective controls.

Real-time PCR analysis of cardiac mRNA of MR or GR in control and transgenic mice (ubc was used as reference gene). We used either primers specific for mouse MR (or GR) or primers common to endogenous and transgenic MR (or GR) to evaluate the level of receptor overexpression in MRcardio and GRcardio mice. The mRNA expression of cardiac MR (or GR) in MRcardio (or GRcardio) mice was about 5 fold higher than in their control littermates. Values in control mice were set as 1 for each gene, and fold changes are shown on the figure; data are provided as means  $\pm$ SEM. n = 3-6 mice per condition. \*, p<0.05, \*\*, p<0.01 transgenic mice compared to their own controls (Mann-Whitney U test).

**Figure 3.** Real-time PCR analysis of four down-regulated genes: vascular endothelial growth factor (VEGF), pyruvate dehydrogenase (Pdhb), isocitrate dehydrogenase (Idh3b) and myeloid leukemia factor 1 (Mif1). The genes were identified as down-regulated in the transcriptomic screening of MRcardio mice. Cardiac VEGF, Pdhb and Idh3b appear specifically down-regulated after MR (not GR) overexpression, while Mif1 was down-regulated in both MRcardio and GRcardio mice. Ubc was used as reference gene. Values in control mice were set as 1 for each gene, and fold changes are shown on the figure; data are provided as means  $\pm$ SEM. n = 3-6 mice per condition. \*, p<0.05, \*\*, p<0.01 transgenic mice compared to their own controls (Mann-Whitney U test).

**SUPPLEMENTAL FIGURE 1**

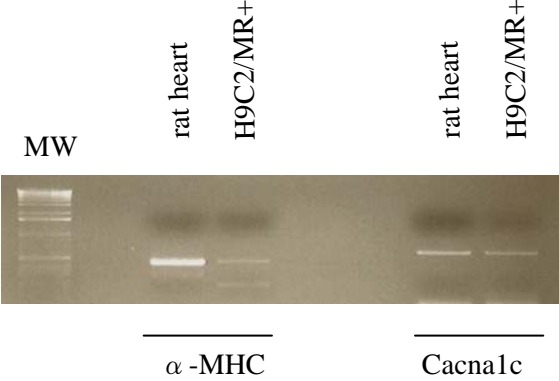

SUPPLEMENTAL FIGURE 2

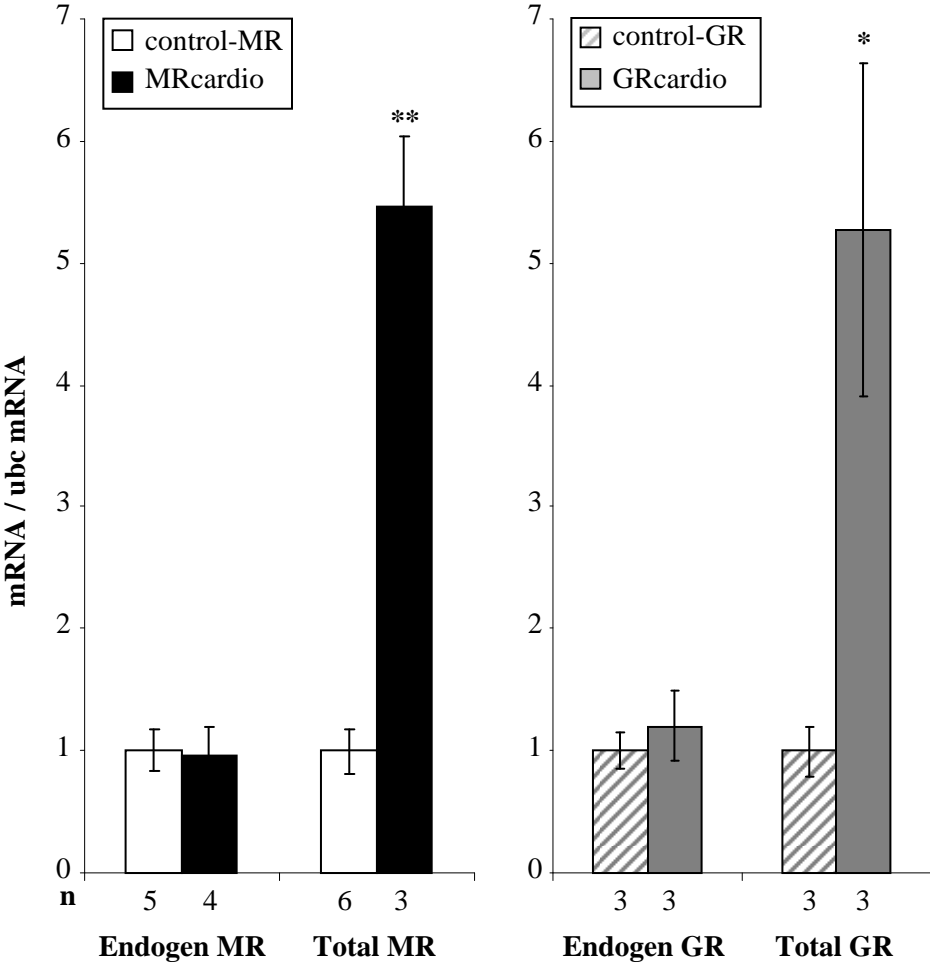

SUPPLEMENTAL FIGURE 3

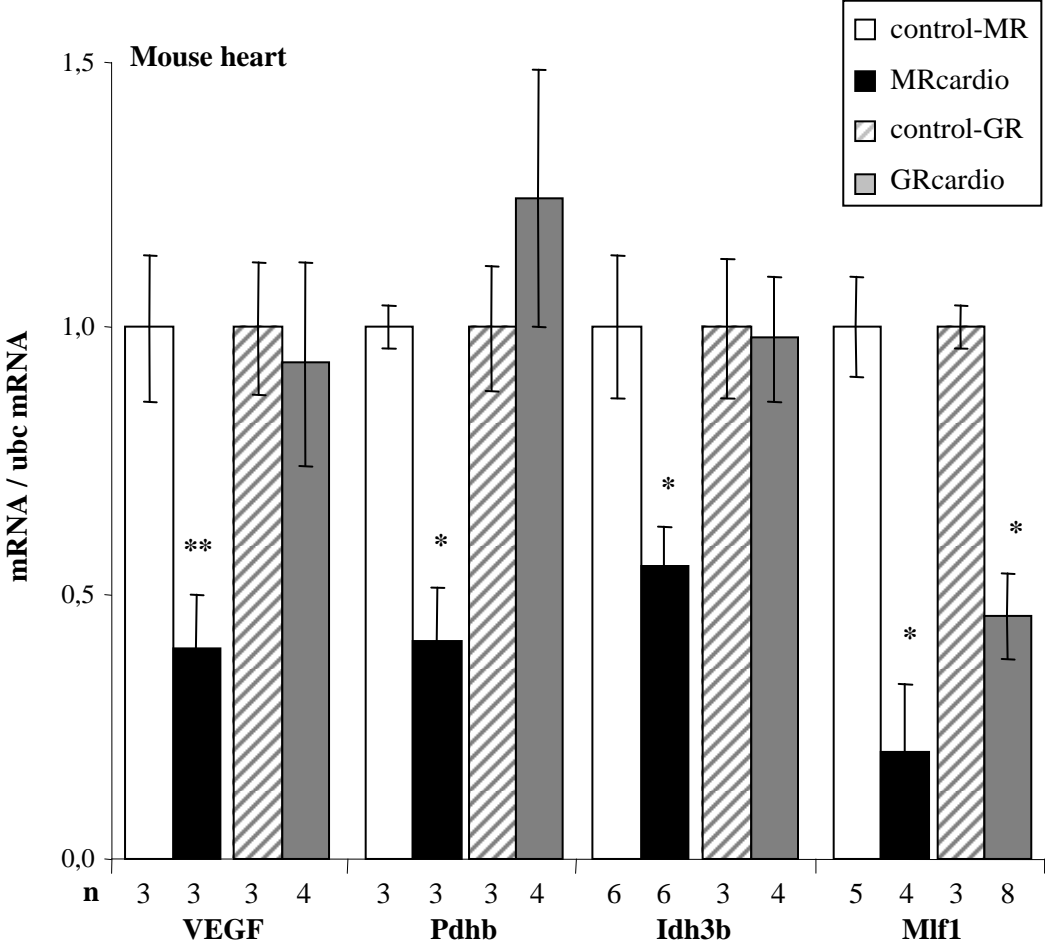

**Table 1:** primers sequences for real time PCR.

| <i>Rattus Norvegicus</i> | Forward (5'→ 3')       | Reverse (5'→ 3')         |
|--------------------------|------------------------|--------------------------|
| β-actin                  | TTCTACAATGAGCTGCGTGTG  | CAGGTCCAGACGCAGGAT       |
| SGK1                     | TGCTCGAAGTACCCTCACCTA  | AGGGGTTGGCGTTCATAAGTT    |
| ADAMTS1                  | CACGGCAGCGGTCTAAAGCAT  | GGTGGAGAAGCGGCATTGCAAGT  |
| PAI-1                    | CGCCTCCTCATCCTGCCTAAGT | CTGTGCCGCTCTCGTTCACCTC   |
| RGS2                     | GAAGACCCGTTTGAGCTATTTT | TGAATGCAGCAAGCCCATATTT   |
| Fkbp5                    | TCGACAAAGCCCTGGTGAA    | AAAACCATAGCGTGGTCCAA     |
| TNX                      | CGTGTTGCGCCAGTATGACTT  | ATTGAGATTGGCGTAGTGACA    |
| Serpina3                 | AGACAAGGGGACACAAGTGG   | TGAGATGCTAAGTGGGGAGAA    |
| Troponin T3              | GAAAAAGGCTCTGTCTCCA    | CAGAGTTCCTTGGCCTTGTC     |
| Fibronectin1             | TTATGACGACGGGAAGACCTA  | CGTTCTCTGATGGTATCTCTGTGT |
| Collagen1a               | GGGCAAGACAGTCATCGAAT   | GGTGGAGGGAGTTTACACGA     |
| <i>Mus musculus</i>      | Forward (5'→ 3')       | Reverse (5'→ 3')         |
| ubc                      | AGCCAGTGTTACCACCAAG    | ACCCAAGAACAAGCACAAGG     |
| S GK1                    | GCATGCAAACACGCTGAAGTT  | ACGGACCCAGGTTGATTTGTT    |
| ADAMTS1                  | AGTGGTGTGTCAGTGGCAAG   | TTCTTTGGGACTGGGTTGTC     |

|              |                         |                         |
|--------------|-------------------------|-------------------------|
| PAI-1        | AGCCAACCACAGCTGAGCG     | GGGCTGAAGACATCTGCATCC   |
| RGS2         | GAAGACCCGTTTGAGCTATTTT  | TGAATGCAGCAAGCCCATATTT  |
| Fkbp5        | TCGACAAAGCCCTGGTGAA     | AAAACCATAGCGTGGTCCAA    |
| TNX          | GTTCTCTGCGGCTAAACTGG    | GATGCTGTCTGCCTTGTGTG    |
| Serpina3     | CATCCCTGTGGGAAGTCAGT    | CTTTTGGGTGGAGGCAGATA    |
| Troponin T3  | GAAAAAGGCTCTGTCTCCA     | CAGAGTTCCTTGGCCTTGTC    |
| Fibronectin1 | CCGGTGGCTGTCAGTCAGA     | CCGTTCCCACTGCTGATTTATC  |
| Collagen1a   | GGGCAAGACAGTCATCGAAT    | GGTGGAGGGAGTTTACACGA    |
| MRendogen    | TCACATTTTTAACATGTGACGGC | GCTTTTCATCCAGAGGAACG    |
| Total MR     | GGCTACCACAGTCTCCCTGA    | ACGTTGACAATCTCCATGTAG   |
| GRendogen    | TGCAGGAGTCTCACAAGACA    | CATGTTGAGCGTGGTCATAA    |
| Total GR     | TGGGACTGTATATGGGAGAG    | GGTTTGCAATGCTTTCTTCC    |
| VEGF         | AACGATGAAGCCCTGGAGTGCG  | ACCGGGATTTCTTGCGCTTTCGT |
| Pdhb         | TCGAAGCCATAGAAGCCAGT    | AGGCATAGGGACATCAGCAC    |
| Idh3b        | TGGAACATGAGAGCGCCAAGGG  | TGGACGGCTGTGACCTTGCT    |
| Mlf1         | AACCACCAAAGGTGTTCCAG    | GCCACTCATCATCAAAGCA     |

**Table 2:** List of cardiac genes that differ between mice overexpressing the glucocorticoid receptor (GR<sub>cardio</sub>) and their control littermates.

| Symbol                    | Accession Number | Full Name                                                                                         | Fold |
|---------------------------|------------------|---------------------------------------------------------------------------------------------------|------|
| <i>Up-regulated genes</i> |                  |                                                                                                   |      |
| RTN4                      | NM_007008        | reticulon 4                                                                                       | 1.57 |
| Gpx1                      | NM_008160        | glutathione peroxidase 1                                                                          | 1.54 |
| FST                       | M19481           | follistatin                                                                                       | 1.52 |
| Hcfc1r1                   | NM_181821        | host cell factor C1 regulator 1 (XPO1-dependent)                                                  | 1.51 |
| Sepr                      | NM_013759        | selenoprotein R                                                                                   | 1.48 |
| Hspb7                     | NM_013868        | heat shock protein family, member 7 (cardiovascular)                                              | 1.45 |
| SNX26                     | AC002398         | sorting nexin 26                                                                                  | 1.45 |
| CLIC5                     | NM_016929        | chloride intracellular channel 5                                                                  | 1.44 |
| Ndel1                     | NM_023668        | nuclear distribution gene E-like homolog 1 ( <i>A. nidulans</i> )                                 | 1.43 |
| Ttid                      | NM_021484        | titin immunoglobulin domain protein (myotilin)                                                    | 1.42 |
| SLC25A5                   | AF240003         | solute carrier family 25 (mitochondrial carrier; adenine nucleotide translocator), member 5       | 1.41 |
| Enah                      | AK020248         | enabled homolog ( <i>Drosophila</i> )                                                             | 1.39 |
| PABPC1                    | X78709           | poly(A) binding protein, cytoplasmic 1                                                            | 1.39 |
| PJA1                      | NM_022368        | praja 1                                                                                           | 1.39 |
| CRYAB                     | NM_001885        | crystallin, alpha B                                                                               | 1.38 |
| RBM5                      | AF091263         | RNA binding motif protein 5                                                                       | 1.38 |
| RPL14                     | D87735           | ribosomal protein L14                                                                             | 1.38 |
| SERF2                     | AF320073         | gastric cancer-related protein VRG107 mRNA, complete cds.                                         | 1.36 |
| HSPB1                     | NM_001540        | heat shock 27kDa protein 1                                                                        | 1.35 |
| PDGFRB                    | NM_002609        | platelet-derived growth factor receptor, beta polypeptide                                         | 1.35 |
| FHL1                      | AF220153         | four and a half LIM domains 1 protein isoform C (FHL1) mRNA, complete cds, alternatively spliced. | 1.34 |
| PGK1                      | NM_000291        | phosphoglycerate kinase 1                                                                         | 1.34 |
| PPP2CA                    | NM_002715        | protein phosphatase 2 (formerly 2A), catalytic subunit, alpha isoform                             | 1.34 |
| Ddef1                     | NM_010026        | development and differentiation enhancing                                                         | 1.30 |
| FHL1                      | NM_001449        | four and a half LIM domains 1                                                                     | 1.29 |

|          |           |                                                                    |      |
|----------|-----------|--------------------------------------------------------------------|------|
| FKSG14   | NM_022145 | leucine zipper protein FKSG14                                      | 1.29 |
| GPR51    | AF074483  | G protein-coupled receptor 51                                      | 1.29 |
| TIMP2    | J05593    | tissue inhibitor of metalloproteinase 2                            | 1.29 |
| SNRPN    | NM_022805 | small nuclear ribonucleoprotein polypeptide N                      | 1.28 |
| Csnk2a1  | NM_007788 | casein kinase II, alpha 1 polypeptide                              | 1.27 |
| SMPD1    | M81780    | sphingomyelin phosphodiesterase 1, acid lysosomal                  | 1.27 |
| Vcl      | NM_009502 | vinculin                                                           | 1.27 |
|          | NM_134141 | RIKEN cDNA 2810413N20 gene                                         | 1.27 |
| EEF1G    | NM_001404 | eukaryotic translation elongation factor 1 gamma                   | 1.26 |
| KIAA0652 | BC006191  | KIAA0652 gene product                                              | 1.26 |
| Gstm2    | NM_008183 | glutathione S-transferase, mu 2                                    | 1.25 |
| SCNN1G   | NM_001039 | sodium channel, nonvoltage-gated 1, gamma                          | 1.25 |
| ARHB     | NM_004040 | ras homolog gene family, member B                                  | 1.23 |
| Atox1    | NM_009720 | ATX1 (antioxidant protein 1) homolog 1 (yeast)                     | 1.23 |
| Defb1    | NM_007843 | defensin beta 1                                                    | 1.23 |
| GNAS     | NM_000516 | GNAS complex locus                                                 | 1.23 |
| Nmyc1    | NM_008709 | neuroblastoma myc-related oncogene 1                               | 1.23 |
| RAB7     | X89650    | RAB7, member RAS oncogene family                                   | 1.23 |
| DAG1     | U43512    | dystroglycan 1 (dystrophin-associated glycoprotein 1)              | 1.22 |
| Fln29    | NM_172275 | FLN29 gene product                                                 | 1.22 |
| GNB1     | NM_002074 | guanine nucleotide binding protein (G protein), beta polypeptide 1 | 1.22 |
| Hig1     | NM_019814 | hypoxia induced gene 1                                             | 1.22 |
| SCNN1A   | NM_001038 | sodium channel, nonvoltage-gated 1 alpha                           | 1.22 |
| Vlre11   | AY065510  | vomer nasal 1 receptor, E11                                        | 1.22 |
| Astrn2   | NM_019514 | astrotactin 2                                                      | 1.21 |
| COL4A5   | NM_000495 | collagen, type IV, alpha 5 (Alport syndrome)                       | 1.21 |
| FOS      | NM_005252 | v-fos FBJ murine osteosarcoma viral oncogene homolog               | 1.21 |
| Gata1    | NM_008089 | GATA binding protein 1                                             | 1.21 |
| MBD1     | AF120982  | methyl-CpG binding domain protein 1                                | 1.21 |



|                             |           |                                                                                          |      |
|-----------------------------|-----------|------------------------------------------------------------------------------------------|------|
| PFKFB3                      | NM_004566 | 6-phosphofructo-2-kinase/fructose-2,6-biphosphatase 3                                    | 1.21 |
| TENC1                       | AB028998  | tensin like C1 domain-containing phosphatase                                             | 1.21 |
| UBA52                       | NM_003333 | ubiquitin A-52 residue ribosomal protein fusion product 1                                | 1.21 |
| Gpx3                        | AK002219  | glutathione peroxidase 3                                                                 | 1.21 |
| RPL15                       | XM_041875 | ribosomal protein L15                                                                    | 1.20 |
|                             | NM_029841 | RIKEN cDNA 2510039O18 gene                                                               | 1.20 |
| Ywhaz                       | NM_011740 | tyrosine 3-monooxygenase/tryptophan 5-monooxygenase activation protein, zeta polypeptide | 1.19 |
| FDFT1                       | NM_004462 | farnesyl-diphosphate farnesyltransferase 1                                               | 1.18 |
| SH3BGR                      | AJ239082  | SH3 domain binding glutamic acid-rich protein                                            | 1.18 |
| CCR4                        | AB023888  | chemokine (C-C motif) receptor 4                                                         | 1.17 |
| EDAR                        | NM_022336 | ectodysplasin 1, anhidrotic receptor                                                     | 1.17 |
| DSP                         | NM_004415 | desmoplakin (DPI, DPII)                                                                  | 1.16 |
| LAMR1                       | BC008867  | laminin receptor 1 (ribosomal protein SA, 67kDa)                                         | 1.16 |
| Miz1                        | NM_008602 | Msx-interacting-zinc finger                                                              | 1.16 |
| MYOD1                       | NM_002478 | myogenic factor 3                                                                        | 1.16 |
| <i>Down-regulated genes</i> |           |                                                                                          |      |
|                             | AK016947  | RIKEN cDNA 4933427E11 gene                                                               | 0.51 |
| Fhl2                        | NM_010212 | four and a half LIM domains 2                                                            | 0.53 |
| Spp1                        | NM_009263 | secreted phosphoprotein 1                                                                | 0.54 |
| Nnp1                        | NM_010925 | novel nuclear protein 1                                                                  | 0.58 |
|                             | AK018837  | RIKEN cDNA 1700016D08 gene                                                               | 0.59 |
| Hint                        | AK002965  | histidine triad nucleotide binding protein                                               | 0.60 |
| Mif1                        | NM_010801 | myeloid leukemia factor 1                                                                | 0.62 |
|                             | AK013431  | RIKEN cDNA 6720475J19 gene                                                               | 0.65 |
|                             | BC019948  | Mus musculus cDNA clone MGC:28155 IMAGE:3983946, complete cds                            | 0.65 |
| FLJ10948                    | AK001810  | hypothetical protein FLJ10948                                                            | 0.66 |
| Lef1                        | NM_010703 | lymphoid enhancer binding factor 1                                                       | 0.66 |
| Ivns1abp                    | NM_054102 | influenza virus NS1A binding protein                                                     | 0.68 |
| VAV3                        | NM_006113 | vav 3 oncogene                                                                           | 0.68 |

|          |           |                                                                                             |      |
|----------|-----------|---------------------------------------------------------------------------------------------|------|
| SPOCK    | NM_004598 | sparc/osteonectin, cwcv and kazal-like domains proteoglycan (testican)                      | 0.69 |
| TNNI2    | NM_003282 | troponin I, skeletal, fast                                                                  | 0.69 |
| Hirip5   | NM_020045 | histone cell cycle regulation defective interacting protein 5                               | 0.70 |
|          | AK015221  | RIKEN cDNA 4930428F12 gene                                                                  | 0.70 |
| ARL6IP4  | NM_018694 | ADP-ribosylation-like factor 6 interacting protein 4                                        | 0.71 |
| PDE3B    | NM_000922 | phosphodiesterase 3B, cGMP-inhibited                                                        | 0.71 |
| SERPINB6 | NM_004568 | serine (or cysteine) proteinase inhibitor, clade B (ovalbumin), member 6                    | 0.71 |
| P4HB     | J02783    | procollagen-proline, 2-oxoglutarate 4-dioxygenase (proline 4-hydroxylase), beta polypeptide | 0.72 |
| KIAA0174 | D79996    | KIAA0174 gene product                                                                       | 0.73 |
| TXNIP    | S73591    | thioredoxin interacting protein                                                             | 0.73 |
|          | AY057808  | Mus musculus chromosome 5, clone RP24-72E12, complete sequence                              | 0.73 |
| Fkbp4    | NM_010219 | FK506 binding protein 4                                                                     | 0.73 |
| BRAP     | NM_006768 | BRCA1 associated protein                                                                    | 0.74 |
| CDK5RAP2 | NM_018249 | CDK5 regulatory subunit associated protein 2                                                | 0.74 |
| Ptma     | NM_008972 | prothymosin alpha                                                                           | 0.74 |
| DKC1     | NM_001363 | dyskeratosis congenita 1, dyskerin                                                          | 0.75 |
| Gda      | NM_010266 | guanine deaminase                                                                           | 0.76 |
| HNRPA1   | NM_002136 | heterogeneous nuclear ribonucleoprotein A1                                                  | 0.76 |
| Ccng2    | NM_007635 | cyclin G2                                                                                   | 0.77 |
| Jam2     | NM_023844 | junction adhesion molecule 2                                                                | 0.77 |
| NAP1     | NM_016481 | Nef associated protein 1                                                                    | 0.77 |
| Prkci    | NM_008857 | protein kinase C, iota                                                                      | 0.77 |
| SETDB1   | NM_012432 | SET domain, bifurcated 1                                                                    | 0.77 |
| Tnip1    | NM_021327 | TNFAIP3 interacting protein 1                                                               | 0.77 |
| UBE4B    | NM_006048 | ubiquitination factor E4B (UFD2 homolog, yeast)                                             | 0.77 |
| Tuba4    | NM_009447 | tubulin, alpha 4                                                                            | 0.77 |
| CALM2    | BC008437  | calmodulin 2 (phosphorylase kinase, delta)                                                  | 0.78 |
| FLJ10276 | NM_018045 | hypothetical protein FLJ10276                                                               | 0.78 |
| FLJ13154 | NM_024598 | hypothetical protein FLJ13154                                                               | 0.78 |

|           |           |                                                                                        |      |
|-----------|-----------|----------------------------------------------------------------------------------------|------|
| FLJ22060  | NM_024612 | hypothetical protein FLJ22060                                                          | 0.78 |
| PPM1B     | NM_002706 | protein phosphatase 1B, magnesium-dependent, beta isoform                              | 0.78 |
| Slc1a5    | NM_009201 | solute carrier family 1 (neutral amino acid transporter), member 5                     | 0.78 |
| Stk2      | NM_009289 | serine/threonine kinase 2                                                              | 0.78 |
| TEBP      | NM_006601 | unactive progesterone receptor, 23 kD                                                  | 0.78 |
| B4GALT7   | NM_007255 | xylosylprotein beta1,4-galactosyltransferase, polypeptide 7                            | 0.79 |
| SCN8A     | NM_014191 | sodium channel, voltage gated, type VIII, alpha polypeptide                            | 0.79 |
| SEMA3C    | NM_006379 | sema domain, immunoglobulin domain (Ig), short basic domain, secreted, (semaphorin) 3C | 0.79 |
| Bad       | NM_007522 | Bcl-associated death promoter                                                          | 0.80 |
| C14ORF133 | NM_022067 | chromosome 14 open reading frame 133                                                   | 0.80 |
| CLK3      | AF033565  | CDC-like kinase 3                                                                      | 0.80 |
| Expi      | NM_007969 | extracellular proteinase inhibitor                                                     | 0.80 |
| HNRPDL    | XM_053038 | heterogeneous nuclear ribonucleoprotein D-like                                         | 0.80 |
| SLC6A7    | NM_014228 | solute carrier family 6 (neurotransmitter transporter, L-proline), member 7            | 0.80 |
| U2AF65    | NM_007279 | U2 small nuclear ribonucleoprotein auxiliary factor (65kD)                             | 0.80 |
| Aadhpt    | AK018191  | aminoadipate-semialdehyde dehydrogenase-phosphopantetheinyl transferase                | 0.81 |
| Dazap2    | NM_011873 | DAZ associated protein 2                                                               | 0.81 |
| FLJ22471  | NM_025140 | limkain beta 2                                                                         | 0.81 |
| GCN5L1    | NM_001487 | GCN5 general control of amino-acid synthesis 5-like 1 (yeast)                          | 0.81 |
| Hand1     | NM_008213 | heart and neural crest derivatives expressed transcript 1                              | 0.81 |
| RNF34     | NM_025126 | ring finger protein 34                                                                 | 0.81 |
| RYR3      | NM_001036 | ryanodine receptor 3                                                                   | 0.81 |
| C6ORF9    | NM_022107 | chromosome 6 open reading frame 9                                                      | 0.82 |
| CGI-110   | NM_016047 | CGI-110 protein                                                                        | 0.82 |
| PTTG1IP   | NM_004339 | pituitary tumor-transforming 1 interacting protein                                     | 0.82 |
| CRLF1     | NM_004750 | cytokine receptor-like factor 1                                                        | 0.84 |
| Ethel     | NM_023154 | ethylmalonic encephalopathy 1                                                          | 0.84 |
| OSBPL2    | AF392447  | oxysterol binding protein-like 2                                                       | 0.84 |
| Timm22    | NM_019818 | translocase of inner mitochondrial membrane 22 homolog (yeast)                         | 0.85 |

|      |          |                                   |      |
|------|----------|-----------------------------------|------|
|      | BC019736 | expressed sequence AI790298       | 0.85 |
| G6PD | L44140   | glucose-6-phosphate dehydrogenase | 0.86 |

**Table 3:** Common genes identified by microarrays in the heart of mice overexpressing the mineralocorticoid receptor (MR<sub>cardio</sub>) or the glucocorticoid receptor (GR<sub>cardio</sub>).

| Symbol                      | Accession Number | Full Name                                                                              | Fold MR | Fold GR |
|-----------------------------|------------------|----------------------------------------------------------------------------------------|---------|---------|
| <i>Up-regulated genes</i>   |                  |                                                                                        |         |         |
| Gpx1                        | NM_008160        | glutathione peroxidase 1                                                               | 1.42    | 1.54    |
| Gpx3                        | AK002219         | glutathione peroxidase 3                                                               | 2.03    | 1.21    |
| Sepr                        | NM_013759        | selenoprotein R                                                                        | 2.77    | 1.48    |
| <i>Down-regulated genes</i> |                  |                                                                                        |         |         |
| Tuba4                       | NM_009447        | tubulin, alpha 4                                                                       | 0.68    | 0.77    |
| Mif1                        | NM_010801        | myeloid leukemia factor 1                                                              | 0.41    | 0.62    |
| SEMA3C                      | NM_006379        | sema domain, immunoglobulin domain (Ig), short basic domain, secreted, (semaphorin) 3C | 0.55    | 0.79    |
| Fkbp4                       | NM_010219        | FK506 binding protein 4                                                                | 0.57    | 0.73    |
